# Supplementary material for: Tracing the Evolution of the Floral Homeotic B- and C-Function Genes through Genome Synteny
Source: PubMed Central journal article supplement — Mol Biol Evol. 2010 Jun 20;27(11):2651–64. doi: 10.1093/molbev/msq156 (PMC2955736; doi:10.1093/molbev/msq156), 2010-06-20
Supplement: supp_msq156_mbe-10-0283-File008.pdf [file supp_msq156_mbe-10-0283-File008.pdf]

| BAC   | Insert size (kb) | Gene | Gene length (bp) | Protein length (aa) | No. introns | Identity                          |                    |                     |                               |
|-------|------------------|------|------------------|---------------------|-------------|-----------------------------------|--------------------|---------------------|-------------------------------|
|       |                  |      |                  |                     |             | Plants                            | <i>Arabidopsis</i> | <i>A. majus</i> EST | Description                   |
| OVATE | 111.3            | Ov1  | 4133             | 366                 | 2           | AAG01120 (tomato)                 | At5g66740          | AJ807510            | Hypothetical protein          |
|       |                  | Ov2  | 14403            | 1360                | 7           | At4g36670 ( <i>Arabidopsis</i> )  | At4g36670          | -                   | Mannitol transporter          |
|       |                  | Ov3  | 2413             | 769                 | 0           | CAB82966 ( <i>Arabidopsis</i> )   | At1g18560          | -                   | hAT transposon                |
|       |                  | Ov4  | 7862             | 294                 | 0           | ANN17752 (tomato)                 | At2g18500          | -                   | Ovate                         |
|       |                  | Ov5  | 4345             | 701                 | 3           | AAU44075 (rice)                   | At3g55340          | AJ798384            | RNA-binding protein (RRM)     |
|       |                  | Ov6  | 2191             | 423                 | 0           | At4g36680 ( <i>Arabidopsis</i> )  | At4g36680          | AJ796087            | PPR repeat protein            |
|       |                  | Ov7  | 10725            | 763                 | 12          | AAG01125 (tomato)                 | At5g49530          | AJ96132             | SIN-like protein              |
|       |                  | Ov8  | 11509            | 458                 | 5           | At4g16580 ( <i>Arabidopsis</i> )* | At4g16580          | AJ559066            | azr-1-like protein            |
|       |                  | Ov9  | 10108            | 805                 | 7           | BAB78478 ( <i>C. maxima</i> )     | At2g18540          | -                   | Cupin-family protein          |
|       |                  | Ov10 | 7153             | 1414                | 2           | CAB77781 ( <i>Arabidopsis</i> )   | -                  | -                   | Copia retroelement            |
|       |                  | Ov11 | 3064             | 527                 | 0           | AAG01129 (tomato)                 | At4g36710          | -                   | Scarecrow-like protein        |
|       |                  | Ov12 | 8352             | 365                 | 10          | AAK14790 ( <i>C. roseus</i> )     | At4g36730          | AJ795447            | bZIP transcription factor     |
|       |                  | Ov13 | 3874             | 578                 | 0           | At5g15010 ( <i>Arabidopsis</i> )  | At5g15010          | -                   | PPR repeat protein            |
|       |                  | Ov14 | 4863             | 397                 | 6           | At5g66710 ( <i>Arabidopsis</i> )  | At5g66710          | -                   | ATN1 kinase-like              |
|       |                  | Ov15 | >2446            | >149                | >2          | BAB18163 ( <i>Z. elegans</i> )    | At4g36740          | AJ791660            | Homeobox transcription factor |

BLASTP was used to identify the closest matches from the *Viridiplantae* (Plants) and *Arabidopsis* datasets. TBLASTN was used to identify matching *Antirrhinum* ESTs. Only those ESTs that gave a significant e-value ( $<10^{-55}$ ) and aligned well to the predicted genes are listed.

\**Arabidopsis* protein At5g66720 also scored highly in BLAST homology searches (see Figure 1A).

BAC accession number: OVATE – FJ404770.
