# Supplementary figures and images for: Tracing the Evolution of the Floral Homeotic B- and C-Function Genes through Genome Synteny
Source: PubMed Central journal article supplement — Mol Biol Evol. 2010 Jun 20;27(11):2651–64. doi: 10.1093/molbev/msq156 (PMC2955736; doi:10.1093/molbev/msq156), 2010-06-20

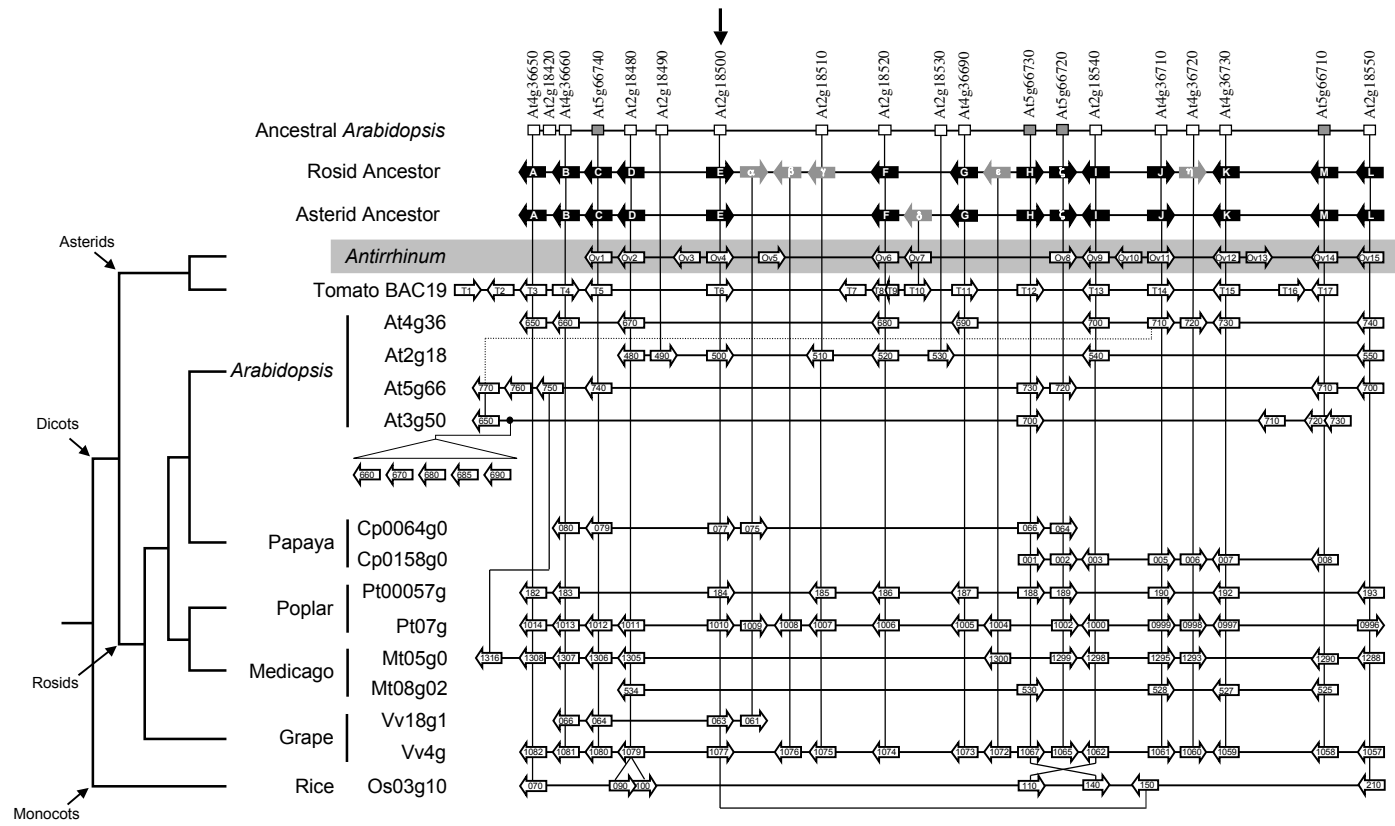

Supplement: supp_msq156_mbe-10-0283-File009.pdf [file supp_msq156_mbe-10-0283-File009.pdf]

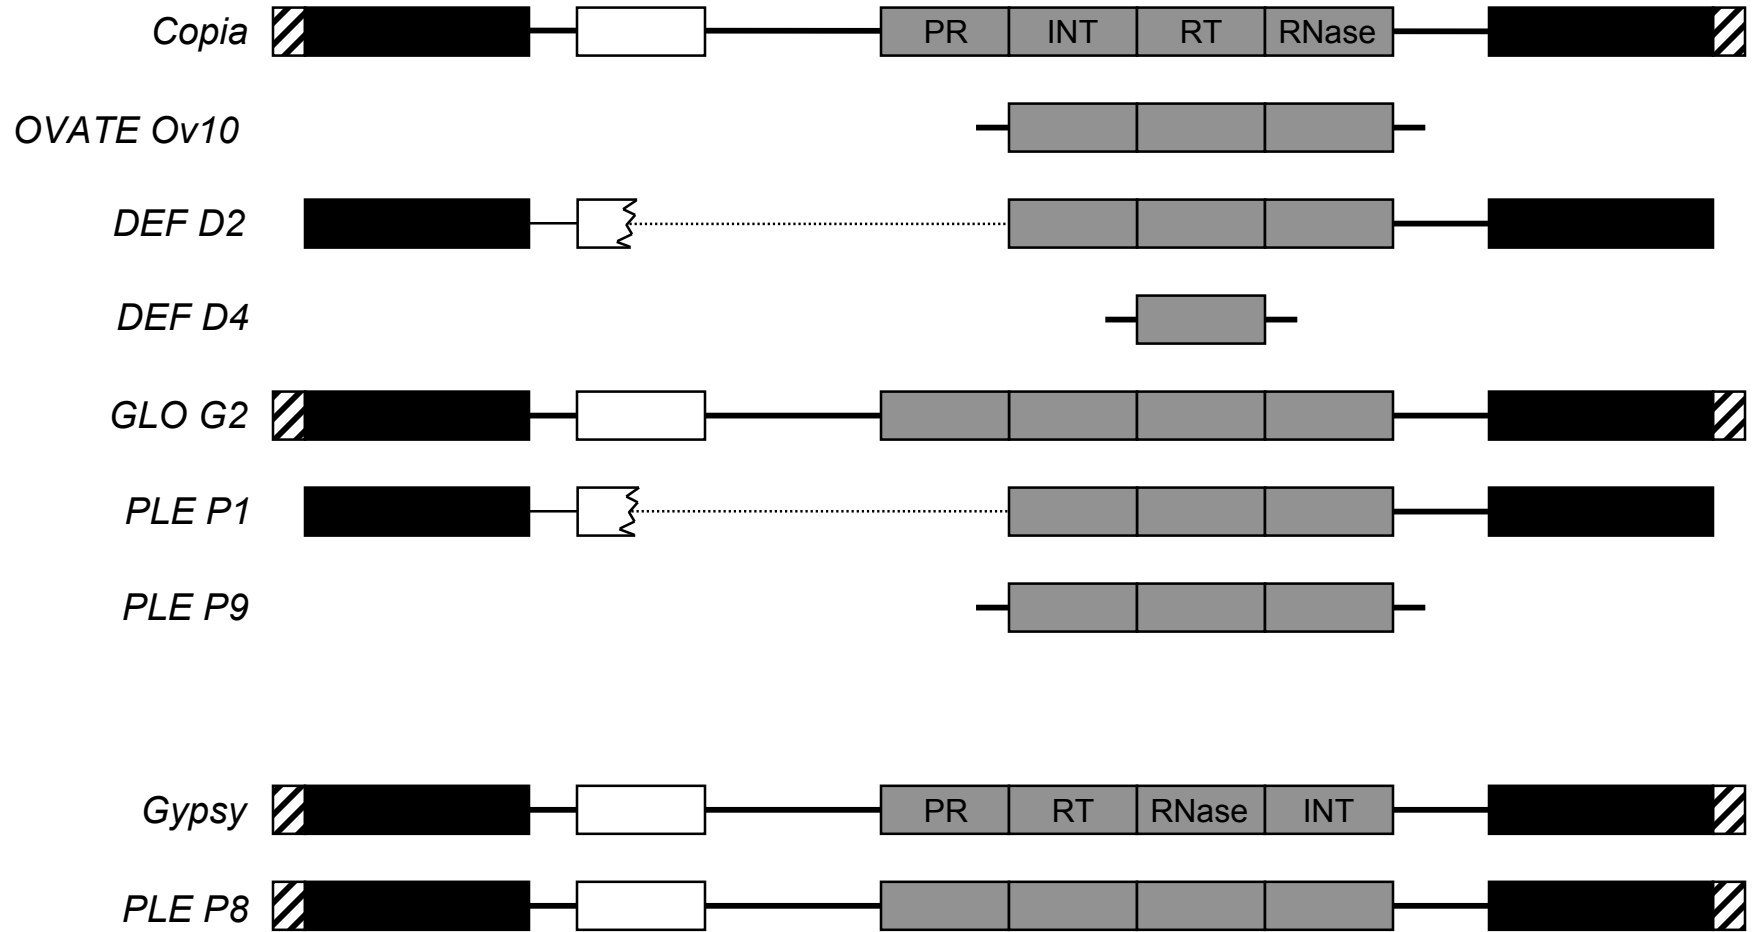

Supplement: supp_msq156_mbe-10-0283-File010.pdf [file supp_msq156_mbe-10-0283-File010.pdf]
